1 **Partial resistance to thyroid hormone-induced tachycardia and cardiac hypertrophy in mice**  
2 **lacking thyroid hormone receptor  $\beta$**

3

4 Riccardo Dore<sup>1</sup>, Sarah Christine Sentis<sup>1</sup>, Kornelia Johann<sup>1</sup>, Nuria Lopez-Alcantara<sup>1</sup>, Julia Resch<sup>1</sup>,  
5 Lars Christian Moeller<sup>2</sup>, Dagmar Fuehrer<sup>2</sup>, Benedikt Obermayer<sup>3</sup>, Robert Opitz<sup>4</sup>, Jens Mittag<sup>1,\*</sup>

6

7 <sup>1</sup>Institute for Endocrinology and Diabetes, Center of Brain Behavior & Metabolism, University  
8 of Lübeck, Ratzeburger Allee 160, 23562 Lübeck, Germany

9 <sup>2</sup>Department of Endocrinology, Diabetes and Metabolism, and Division of Laboratory  
10 Research, University of Duisburg-Essen, Hufelandstraße 55, 45147 Essen, Germany

11 <sup>3</sup>Core Unit Bioinformatics, Berlin Institute of Health at Charité, Universitätsmedizin Berlin,  
12 Chariteplatz 1, 10117 Berlin, Germany

13 <sup>4</sup>Institute of Experimental Pediatric Endocrinology, Charité Universitätsmedizin Berlin,  
14 Augustenburger Platz 1, 13353 Berlin, Germany

15

16

17 \* corresponding author: Prof. Dr. Jens Mittag, Institute for Endocrinology & Diabetes, Center  
18 of Brain, Behavior and Metabolism, University of Lübeck, Ratzeburger Allee 160, 23562  
19 Lübeck, Germany, Tel. +49(0)451-31017826; Email: [jens.mittag@uni-luebeck.de](mailto:jens.mittag@uni-luebeck.de)

20

21

22 **Running Title:** TR $\beta$  in heart function regulation

23

24

25 **Key Words:** thyroid hormone, heart, thyroid hormone receptor  $\beta$ , heart rate, tachycardia,  
26 hypertrophy

27

28 **Abstract**

29 *Background:* Thyroid hormones regulate cardiac functions mainly via direct actions in the  
30 heart and binding to the thyroid hormone receptor (TR) isoforms  $\alpha 1$  and  $\beta$ . While the role of  
31 the most abundantly expressed isoform, TR $\alpha 1$ , is widely studied and well characterized, the  
32 role of TR $\beta$  in regulating heart functions is still poorly understood, primarily due to the  
33 accompanying elevation of circulating thyroid hormone in mice lacking TR $\beta$  (TR $\beta$ -KO).  
34 However, their hyperthyroidism is ameliorated at thermoneutrality, which allows studying the  
35 role of TR $\beta$  without this confounding factor.

36 *Methods:* Here we non-invasively monitored heart rate in TR $\beta$ -KO mice over several days using  
37 radiotelemetry at different housing temperatures (22°C and 30°C), and upon T3  
38 administration in comparison to wildtype animals.

39 *Results:* TR $\beta$ -KO mice displayed normal average heart rate at both 22°C and 30°C with only  
40 minor changes in heart rate frequency distribution, which was confirmed by independent  
41 electrocardiogram recordings in freely-moving conscious mice. Parasympathetic nerve  
42 activity was, however, impaired in TR $\beta$ -KO mice at 22°C, and only partly rescued at 30°C. As  
43 expected, oral treatment with pharmacological doses of T3 at 30°C led to tachycardia in  
44 wildtypes, accompanied by broader heart rate frequency distribution and increased heart  
45 weight, while TR $\beta$ -KO mice showed blunted tachycardia, as well as resistance to changes in  
46 heart rate frequency distribution and heart weight. At the molecular level, these observations  
47 were paralleled by a blunted cardiac mRNA induction of several important genes, including  
48 the pacemaker channels *Hcn2* and *Hcn4*, as well as *Kcna7*.

49 *Conclusions:* The phenotyping of TR $\beta$ -KO mice conducted at thermoneutrality allows novel  
50 insights on the role of TR $\beta$  in cardiac functions in absence of the usual confounding  
51 hyperthyroidism. Even though TR $\beta$  is expressed at lower levels than TR $\alpha 1$  in the heart, our  
52 findings demonstrate an important role for this isoform in the cardiac response to thyroid  
53 hormones.

54

55

56

57

58

59

## 60 Introduction

61 It has been long recognized that thyroid hormones (THs) tightly control cardiac activity, with  
62 tachycardia as one of the typical hallmarks of hyperthyroidism, and bradycardia observed in  
63 hypothyroidism (1, 2). THs, and specifically the active hormone 3,3',5-triiodothyronine (T3),  
64 primarily act through regulating gene expression by the two nuclear receptors TR $\alpha$ 1 and TR $\beta$ ,  
65 which show a different pattern of expression throughout the body. For the heart, recent gene  
66 expression studies suggest that TR $\alpha$ 1 is the major isoform; however, TR $\beta$  also accounts for  
67 ~30% of the total ligand-binding isoforms in the sinoatrial pacemaker cells and heart ventricles  
68 (3-5). Consequently, a number of studies have conclusively shown that mice carrying a  
69 mutation or deletion of TR $\alpha$ 1 are bradycardic despite relatively normal circulating levels of  
70 THs (6-13). The role of TR $\beta$  in heart functions on the other hand is more controversial, as the  
71 knockout of TR $\beta$  leads to a hyperthyroid phenotype as a consequence of the disrupted  
72 negative feedback loop of the hypothalamus-pituitary-thyroid (HPT) axis - a confounding  
73 factor which renders the understanding of TR $\beta$ 's role in cardiac functions more difficult.  
74 Therefore, a number of studies observed a modest increase by 6-11% in heart rate in TR $\beta$ -KO  
75 mice, which is likely attributed to the elevated circulating THs levels and their action on the  
76 intact TR $\alpha$ 1 (7, 9, 14). Interestingly, however, previous research reported an increase in heart  
77 rate of TR $\alpha$ 1-KO mice upon T3, indicating that TR $\beta$  might also play an important role in the  
78 regulation of cardiac functions (12, 13).

79 In addition to the endocrine regulation, heart rate is also regulated by the autonomic  
80 nervous system (ANS), with the sympathetic branch increasing heart rate and the  
81 parasympathetic branch decreasing it (15). One major factor that greatly affects autonomic  
82 activity in both humans and rodents is the ambient temperature. In mice, it has been shown  
83 that the usual housing at room temperature (20-22°C) causes sympathetic activation with  
84 permanently elevated heart rate, and that even small changes in housing temperature (e.g.  
85 due to high housing density) can significantly affect heart rate in mice (16-19). Therefore, the  
86 conclusions from previous studies in rodents may have overestimated any cardiac phenotype  
87 due to the constant cold stress in animals housed at room temperature. To circumvent this  
88 issue, mice can be housed at thermoneutrality, a condition that is considered more  
89 translationally relevant (20-22). Even more importantly, as we have previously shown that  
90 housing at thermoneutrality strongly reduces the hyperthyroidism in TR $\beta$ -KO mice (23), this  
91 condition can eliminate confounding factors, thus allowing us to better study the role of TR $\beta$   
92 in cardiac regulation.

93           In this study, we employed well-established radiotelemetry in conscious and freely  
94 moving TR $\beta$ -KO mice to long-term monitor heart rate and locomotor activity at room  
95 temperature (22°C) as well as at thermoneutrality (30°C). Furthermore, to better dissect the  
96 contribution of the sympathetic and parasympathetic nervous system in modulating cardiac  
97 activity, TR $\beta$ -KO mice were subjected to pharmacological denervation. Additionally, to  
98 conclusively clarify the role of the  $\beta$  isoform in thyroid hormone-induced tachycardia and  
99 cardiac hypertrophy, heart rate and weight were measured without and upon oral T3  
100 treatment. Finally, the expression levels of several cardiac function-related markers (involved  
101 in pacemaking, repolarization and calcium handling) were quantified by quantitative real-time  
102 PCR following oral T3 treatment.

103

104

## 105 **Materials and Methods**

### 106 *Animals Husbandry*

107 Male TR $\beta$ -KO mice (24, 25) and control wildtypes were bred on the C57Bl/6NCrI background  
108 in the Gemeinsame Tierhaltung (GTH) of the University of Lübeck. Immediately after  
109 radiotelemetry transmitter implantation, animals were single housed in wire-topped, plastic  
110 cages (Techniplast, Italy) in a 12-hour light/dark cycle (lights on at 6:00 am), temperature-  
111 controlled (22 and 30  $\pm$  1°C) air flow cabinet with *ad libitum* access to water and food (#1314,  
112 Altromin, Germany). Mice were ~5-month old at experiments' commencement. All animal  
113 experiments were carried out according to EU guideline regulations (210/63/EU) and  
114 approved by the MEKUN Schleswig-Holstein (Germany).

115

### 116 *In vivo Electrocardiogram*

117 *In vivo* electrocardiograms (ECG) were recorded and analyzed using ECGenie system (Mouse  
118 Specifics, Inc., MA, USA). Mice were acclimated to an electrode-fitted platform (7  $\times$  7.5  $\times$  27  
119 cm) for at least 10 minutes prior to data collection. On average, a number of 207 complexes  
120 per animal were analyzed.

121

### 122 *In vivo Radiotelemetry Recording*

123 Implantable radio transmitters (Mini-Mitter Respirationics, Bend, OR, USA) were used to  
124 determine heart rate and locomotor activity in conscious, undisturbed freely moving mice.  
125 Radio transmitters were implanted as described previously (11, 26-28) and animals recovered  
126 for 7 days prior to recording. Parameters were recorded every 30 s. For the long-term  
127 monitoring of heart rate and locomotor activity, samples were analyzed by calculating the 6-  
128 h average. To study the effect of housing temperatures and T3 on heart rate frequency  
129 distribution, the data were split into 20-bpm frequency bins and analyzed.

130

### 131 *Pharmacological Denervation*

132 To study autonomic input and dissect sympathetic and parasympathetic contributions for  
133 control of heart rate, mice were intraperitoneally injected first with saline and, 45 minutes  
134 later, with scopolamine methyl bromide (0.1 mg/kg body weight; #S8502, Sigma-Aldrich,

135 Germany) to block muscarinic receptors (PSNS). Finally, 45 minutes later, mice were injected  
136 with timolol maleate (1 mg/kg body weight; #T6394, Sigma-Aldrich, Germany) to block  $\beta$ -  
137 adrenergic receptors (SNS). Heart rate was constantly recorded through radiotelemetry.  
138 Pharmacological denervation experiments were conducted in the first half of inactive light  
139 phase. The median of each 45-min intervals and the differences in bpm were then calculated  
140 off-line ( $\Delta$ PSNS: median [scopolamine] - median [saline];  $\Delta$ SNS: median [timolol] - median  
141 [scopolamine]). The intrinsic heart rate in bpm was recorded upon full receptors block (i.e. 45  
142 minutes after timolol maleate administration).

143

#### 144 *Pharmacological Treatment with Oral T3*

145 Hyperthyroidism was induced at a housing temperature of  $30 \pm 1^\circ\text{C}$  by treating the mice with  
146 0.5 mg/L 3,3',5-Triiodo-L-thyronine (#T6397, Sigma Aldrich, Germany) in 0.01% BSA and tap  
147 water for 12 days. Mice were provided every two days with freshly diluted solution and the  
148 water intake was monitored. Average daily dose of T3 was  $\sim 5\mu\text{g}/30\text{g}$  of BW, which was  
149 previously shown to result in a  $\sim 6$ - to 8-fold elevation in serum T3 and suppression in serum  
150 T4 (6, 29).

151

#### 152 *Sacrifice, Organ Harvesting and RT-qPCR*

153 Mice were euthanized using carbondioxide or isoflurane in combination with cervical  
154 dislocation. The hearts were quickly harvested, weighed, deep frozen in liquid nitrogen and  
155 stored at  $-80^\circ\text{C}$ . Gene expression was performed as described previously (26, 30). The mRNA  
156 levels of target genes were normalized to those of *Cyclophilin D* and expressed in percentages  
157 to the wildtypes at  $30^\circ\text{C}$ . Sequences of gene-specific primers are provided in Supplementary  
158 Table S1.

159

#### 160 *T3/T4 ELISA*

161 After sampling, blood was centrifuged (1000 rpm for 10 minutes at  $4^\circ\text{C}$ ) to obtain serum for  
162 subsequent total T3 (DNOV053; NovaTec Immundiagnostica GmbH, Germany) and T4 (EIA-  
163 1781; DRG Instruments GmbH, Germany) levels determination by following manufacturer's  
164 instructions.

165 *Re-analysis of Tabula muris senis single-cell data*

166 Fully processed and annotated FACS single-cell data for mouse heart were downloaded from  
167 Figshare (<https://figshare.com/ndownloader/files/23872838>) and a dot plot was generated  
168 for selected genes using scanpy (v1.9.3; (31)).

169

170 *Statistical Analysis*

171 All statistical analyses were performed using Excel (2016/2010/365, Version 2303) and  
172 GraphPad Prism 9.0 (GraphPad Software, US). Locomotor activity and heart rate were  
173 analyzed using two-way repeated measure (RM) analysis of variance (ANOVA) with genotype  
174 as between-subjects factor and time as within-subject factor or using unpaired Student's *t*-  
175 test. Heart rate frequency distribution was analyzed using two-way RM-ANOVA with genotype  
176 as between-subjects factor and frequency bin as within-subject factor. Kurtosis and Skewness  
177 were analyzed using two-way RM-ANOVA with genotype as between-subjects factor and  
178 temperature as within-subject factor. Pharmacological denervation, intrinsic heart rate and  
179 ECG parameters were analyzed using unpaired Student's *t*-test. The effect of T3 treatment  
180 was analyzed using two-way RM-ANOVA with genotype as between-subjects factor and time  
181 as within-subject factor. Normalized heart weight and gene expression were analyzed using  
182 two-way ANOVA with genotype and treatment as between-subjects. Total T3 and T4 serum  
183 levels were analyzed using either two-way ANOVA with genotype and temperature as  
184 between-subjects or unpaired Student's *t*-test. *Post hoc* analysis was performed by using  
185 Sidak's test. All data are expressed as mean  $\pm$  standard error of the mean (SEM) and  
186 differences were considered statistically different at  $p < 0.05$ . Further details can be found in  
187 Supplementary Table S2.

188

## 189 Results

190 To gain more insights into the role of TR $\beta$  in the regulation of heart rate, the animals  
191 were non-invasively monitored using radiotelemetry at room temperature (22°C) and,  
192 subsequently, at thermoneutrality (30°C). Heart rate was not different between TR $\beta$ -KO and  
193 wildtype mice at neither temperature (Fig. 1A and B). As expected, a general reduction of  
194 heart rate by thermoneutrality was observed in both groups, indicating the shift from  
195 predominantly SNS to more PSNS control at 30°C. At 22°C, overall locomotor activity was  
196 reduced in TR $\beta$ -KO as compared with wildtype mice, but solely due to reduced activity during  
197 the dark active phase (-23%; Fig. 1C), comparable to what has been observed in a previous  
198 study of a hypothalamic TR $\beta$  knockdown (32). This difference in overall locomotor activity was  
199 no longer significant at 30°C (Fig. 1D). Total T3 and T4 serum levels of TR $\beta$ -KO mice were  
200 elevated by 75% compared to controls at 22°C, but not at 30°C (Suppl. Fig. 1A), as expected  
201 from previous studies (23). To further confirm the lack of tachycardia observed in the  
202 radiotelemetry experiments in spite of high TH levels at 22°C, we performed ECG recordings  
203 in another set of non-implanted mice. While we observed a significant shortening of QRS  
204 complexes duration in TR $\beta$ -KO mice, general heart rate remained unchanged between  
205 genotypes (Suppl. Fig. 1B and C).

206 To quantify heart rate variability, the 3-day-long heart rate monitoring was split into  
207 20-bpm bins and the frequency distribution was analyzed. Even though the heart rate  
208 frequency distribution of TR $\beta$ -KO mice appeared to be broader than that of wildtypes, this  
209 finding was not significantly different (Fig. 2A). Again, when mice were housed at 30°C, there  
210 was a predominant PSNS control of heart rate as evidenced by a narrower distribution in both  
211 genotypes as compared with 22°C, leading to a visible temperature effect in kurtosis and  
212 skewness, which however failed to reach significance (Suppl. Fig. 2A). Interestingly, at 30°C,  
213 the heart rate frequency distribution was significantly narrower in TR $\beta$ -KO mice as compared  
214 to controls.

215 When we tested autonomic activity by using pharmacological blockade of PSNS and  
216 SNS *in vivo*, we observed impairment in the PSNS activity of TR $\beta$ -KO mice when housed at 22°C  
217 as indicated by a significantly reduced response to scopolamine methyl bromide. This was  
218 partially rescued at 30°C, as the residual 66% reduction was no longer significant, suggesting  
219 a beneficial effect of thermoneutrality on the PSNS activity in TR $\beta$ -KO (Fig. 2B). SNS activity  
220 did not differ between groups at any housing temperature as indicated by a comparable  
221 response to timolol maleate (Fig. 2B). Upon complete pharmacological autonomic receptor



222 blockade, no change in intrinsic heart rate was observed in TR $\beta$ -KO mice at both temperatures  
223 (Fig. 2C). When we quantified mRNA expression levels of muscarinic receptor type 2 (*Chrm2*)  
224 and adrenoceptor type 1 (*Adrb1*) in the heart as a possible molecular mechanism underlying  
225 this pharmacological denervation response, we found no differences between groups at  
226 neither temperature (Fig. 2D).

227         Next, to induce tachycardia, we treated TR $\beta$ -KO and wildtype mice with T3 in the  
228 drinking water for 12 days at 30°C. As previously shown (6, 29), this pharmacological  
229 treatment led to a robust 5- to 7-fold elevation in serum levels of T3 and a parallel suppression  
230 in those of T4, with somewhat higher T3 levels in TR $\beta$ -KO mice (Suppl. Fig. 2B). As expected,  
231 while T3 treatment prominently increased heart rate in wildtype mice already after 2-3 days  
232 as compared to baseline, the effect was blunted in TR $\beta$ -KO mice resulting in a significantly  
233 reduced heart rate as compared to wildtypes (Fig. 3A). In addition, while the minimum heart  
234 rate reached during the light inactive phase was unaltered by T3 treatment in both groups,  
235 the maximum heart rate recorded in the dark active phase was significantly reduced in TR $\beta$ -  
236 KO as compared to controls (Suppl. Fig. 2C). On average, the delta heart rate measured  
237 between the dark and light phase was significantly smaller in TR $\beta$ -KO mice (Fig. 3B). As  
238 reported previously (6), the heart rate frequency distribution of wildtypes broadened upon  
239 T3, whereas that of TR $\beta$ -KO mice remained narrower as compared to the untreated condition  
240 and to wildtypes (Fig. 3C and Suppl. Fig. 2D and E). Heart weight was not different between  
241 groups at 30°C in untreated condition; however, T3 treatment resulted in a significant increase  
242 in the heart weight of wildtypes, which was not observed in TR $\beta$ -KO mice, resulting in a  
243 significant 14% reduction in heart weight compared to controls (Fig. 3D).

244         In line with the radiotelemetry data, the basal mRNA levels of the two pacemaker  
245 genes *Hcn2* and *Hcn4* were comparable to controls. Interestingly, while the expression of *Hcn2*  
246 was strongly induced by T3 in both genotypes, this was observed to a much lesser extent in  
247 TR $\beta$ -KO mice (+408% vs. 132%), resulting in significantly lower mRNA levels as compared to  
248 T3 treated wildtypes. Likewise, the expression of *Hcn4* was significantly induced only in  
249 wildtype animals (Fig. 4A). When we additionally quantified mRNA levels of other potassium  
250 channels implicated in cardiac repolarization, we found that similarly *Kcna7* was significantly  
251 induced by T3 treatment in wildtype but not in TR $\beta$ -KO mice. While the expression levels of  
252 *Kcnj3* and *Kcnq1* were significantly reduced by T3 treatment in both genotypes, those of *Kcnh2*  
253 were unresponsive to T3 and significantly lower in TR $\beta$ -KO mice as compared with wildtypes,  
254 suggesting that the proper transcription of this channel may require intact TR $\beta$  (Fig. 4A). When  
255 the ratio between *Myh6* and *Mhy7* was calculated as a measure of cardiac hypertrophy, the

256 expected significant elevation in both groups was observed (Fig. 4A). Finally, we quantified  
257 the expression level of genes involved in calcium handling and cardiac contraction. While T3  
258 treatment slightly but significantly lowered *Atp2a2* (Serca2) mRNA levels only in wildtype  
259 mice, those of *Pln*, an endogenous inhibitor of SERCA2 activity, were significantly decreased  
260 in both wildtype and TR $\beta$ -KO mice (Fig. 4A), resulting in a significant reduction in the ratio  
261 between *Pln* and *Atp2a2* in both genotypes (Suppl. Fig. 2F). The basal mRNA levels of *Ryr2*  
262 were significantly increased by 30% as compared to controls and interestingly, while T3  
263 treatment enhanced *Ryr2* levels in wildtypes, it decreased them in TR $\beta$ -KO mice. However,  
264 there were no significant differences between wildtypes and TR $\beta$ -KO upon T3 in any of these  
265 calcium handling-related genes (Fig. 4A), suggesting that they are not involved in the observed  
266 partial resistance. Interestingly, when we measured *Dio2*, we observed generally low  
267 expression as expected, but a clear TR $\beta$  dependent acute regulation (Suppl. Fig. 2F). Finally,  
268 to better understand whether TR $\beta$  could be directly involved in the regulation of the tested  
269 genes, we reanalyzed published single-cell RNA sequencing data of adult mouse hearts to  
270 identify TR $\beta$  expressing cell types using the Tabula muris senis data set (33). These data  
271 showed expression of TR $\beta$  primarily in cardiomyocytes as well as lower TR $\beta$  expression in  
272 endocardial cells, smooth muscle cells and fibroblasts, which also expressed *Dio2* (Fig. 4B),  
273 thus supporting the possibility of a TR $\beta$  dependent regulation.

274

275 **Discussion**

276 The main findings of the present study were: TR $\beta$ -KO mice showed (i) normal heart  
277 rate both at room temperature and thermoneutrality, (ii) moderately reduced locomotion and  
278 parasympathetic activity at room temperature, which were partially rescued at  
279 thermoneutrality; (iii) resistance to T3-induced tachycardia and cardiac hypertrophy, and (iv)  
280 altered expression of several cardiac activity-related genes, including *Hcn2*, *Kcna7* and *Ryr2*.  
281 Together, these findings suggest only a negligible role for TR $\beta$  under baseline conditions, but  
282 a more important contribution of the receptor in condition of systemic hyperthyroidism.

283

284 *TR $\beta$  is required for T3 induced cardiac hypertrophy*

285 The induction of cardiac hypertrophy is one of the most classic effects triggered by  
286 THs (34). In addition to direct actions onto cardiomyocytes, THs-induced cardiac hypertrophy  
287 seems to be induced mainly, if not exclusively, *via* the modulation of the ANS (for review, see  
288 (35)). In fact, THs increase the expression/activity of  $\beta$ -adrenoceptors leading to a greater  
289 sensitivity of the heart to sympathetic stimulation and, eventually, to positive inotropic effects  
290 (36-38). Moreover, chronic administration of the  $\beta$ -adrenoceptors agonist isoproterenol  
291 increases heart weight (39, 40). Conversely, treatment with the  $\beta$ -adrenoceptors blocker  
292 propranolol inhibits T3-induced cardiac hypertrophy in parallel with increased heart rate (41).  
293 Corroborating these findings, while wildtype mice display cardiac hypertrophy after  
294 pharmacological treatment with either  $\beta$ -adrenoceptors agonist or T3, this effect was not  
295 observed in mice lacking all the  $\beta$ -adrenoceptors (42), indicating that T3-induced cardiac  
296 hypertrophy is to a large extent generated by the ANS. Consequently, Ortiga-Carvalho et al.  
297 (43) observed that while whole-body TR $\beta$  mutant mice developed cardiac hypertrophy upon  
298 T3 treatment, this effect was not displayed by animals with cardiac-specific TR $\beta$  mutation. In  
299 the present study, we found that control animals have a 36% increase in heart weight  
300 following T3 treatment, a clear indication of cardiac hypertrophy. This effect is not surprising  
301 considering that the pharmacological treatment employed here induced a 5- to 7-fold  
302 elevation in circulating T3 (6, 29) and that a significant increase in heart weight is detectable  
303 even upon lower doses of T3 (26). In contrast, TR $\beta$ -KO mice did not show similarly increased  
304 heart weight, suggesting that TR $\beta$  is required for the development of T3 induced cardiac  
305 hypertrophy at 30°C, an effect previously shown also at room temperature (43-45). While this  
306 effect cannot be simply attributed to acute differences in the *Myh6/Myh7* or *Pln/Atp2a2*  
307 (*Serca2*) ratio, as the levels were comparable to T3 treated wildtypes, it remains unclear

308 whether this is the result of altered TR $\beta$  action in other tissues including the brain, or whether  
309 permanent alterations arising from the lack of TR $\beta$  during development could be involved.

310

311 *Lack of TR $\beta$  does not affect basal heart rate frequency at 22°C and 30°C*

312 Previous studies have shown a modest increase in heart rate of TR $\beta$ -KO mice as a  
313 result of higher levels of THs; however, these experiments were all conducted in animals  
314 housed at room temperature, thus permanently exposed to minor cold stress (7, 9, 14). Here  
315 we show that the lack of TR $\beta$  has no effect on heart rate as evidenced by our *in vivo*  
316 radiotelemetry as well as ECG experiments at room temperature, indicating that the moderate  
317 ~75% elevation in THs levels observed at 22°C is not sufficient to induce tachycardia in mice.  
318 This observation is in complete accordance with our previous results showing a normal heart  
319 rate frequency profile in mice with similarly elevated TH levels (26).

320 A particular advantage of our present study is the phenotyping at thermoneutrality, a  
321 condition that better resembles that of humans, as animals are no longer cold-stressed and  
322 heart rate is predominantly under the control of the parasympathetic nervous system (21, 22).  
323 More importantly, we confirmed that housing at 30°C leads to a significant normalization of  
324 TH levels in TR $\beta$ -KO mice, allowing us to assess the contribution of the TR $\beta$  on heart functions  
325 without the confounding factors cold-stress and hyperthyroidism. Our *in vivo* data at  
326 thermoneutrality show normal heart rate in TR $\beta$ -KO mice together with comparable cardiac  
327 levels of the two pacemaker T3-target genes *Hcn2* and *Hcn4*. These results are in agreement  
328 with the notion that the expression of these two key pacemaker genes is mainly regulated by  
329 TR $\alpha$ 1, and the previously observed increase in *Hcn2* and *Hcn4* in hyperthyroid tachycardic TR $\beta$ -  
330 KO mice (4, 46). When we induced a hyperthyroid state by T3 treatment for 12 days, TR $\beta$ -KO  
331 mice developed tachycardia but not to the same extent as the control animals, suggesting that  
332 TR $\beta$  may have an important role in allowing the heart to reach and sustain the maximum  
333 response/performance in a hyperthyroid state. The data are in agreement with a previous  
334 study showing a total failure of TR $\beta$ -KO mice to develop tachycardia upon T3 treatment (7);  
335 however, although the dose of T3 employed was comparable to that of our study, the  
336 treatment was restricted to only four days which may have been insufficient to generate any  
337 tachycardia in the somewhat resistant TR $\beta$ -KO mice. Most importantly, when TR $\alpha$ 1-KO mice  
338 with intact TR $\beta$  signaling were treated with T3, a robust increase in heart rate was observed,  
339 strongly suggesting a contribution of TR $\beta$  in regulating heart activity upon T3 (12, 13). Our  
340 data of blunted tachycardia in T3 treated TR $\beta$ -KO mice match the molecular profile showing a

341 reduced induction by T3 of the pacemaker gene *Hcn2* as well as the potassium channel *Kcna7*.  
342 It remains, however, to be determined whether this constitutes a developmental defect in  
343 TR $\beta$ -KO mice similar to that observed in TR $\alpha$ 1 mutant mice (6, 30) or whether TR $\beta$  impairs  
344 cardiac adrenergic signaling by e.g. actions in other tissues, as this system has also been shown  
345 to be crucial for pacemaker gene induction (42).

346

#### 347 *Altered PSNS activity and heart rate distribution in TR $\beta$ -KO mice*

348 Since heart rate is also indirectly regulated through the modulation of the ANS, we  
349 aimed at dissecting the contributions of SNS and PSNS. Interestingly, while SNS activity was  
350 normal at both temperatures, TR $\beta$ -KO mice displayed reduced PSNS activity at 22°C, which  
351 was partially rescued by thermoneutrality. This improvement in PSNS activity seems not to be  
352 due to changes in muscarinic (*Chrm2*) and/or  $\beta$ -adrenergic (*Adrb1*) receptors as their gene  
353 expression remained unchanged. Furthermore, our observation of normal intrinsic heart rate  
354 indicates no cardiac defects caused by the lack of TR $\beta$ , suggesting that developmental and/or  
355 functional defects may reside in other structures (e.g. the hypothalamus). At present, it is  
356 difficult to establish whether the decrease in PSNS activity is related to the different T3 levels  
357 at 22°C and 30°C. While we observed that a 6-fold increase in T3 levels leads to decreased  
358 PSNS activity in mice housed at thermoneutrality (6), in another study we showed that mice  
359 housed at room temperature with moderately increased T3 levels similar to those of the TR $\beta$ -  
360 KO mice had normal PSNS activity (26), suggesting that only levels of T3 above a certain  
361 threshold may affect the PSNS. Given that previous studies showed normal SNS and PSNS  
362 activity in TR $\beta$  KO mice at room temperature (7), it seems likely that the effects of TR $\beta$  on  
363 PSNS activity are negligible unless they develop a strong hyperthyroid condition.

364 Another interesting result observed was the altered heart rate frequency distribution,  
365 with a generally broader distribution at 22°C and narrower at 30°C, indicative of a less  
366 stringent central control of heart rate at room temperature. In fact, while wildtypes mice show  
367 broader heart rate frequency distribution during T3 treatment as expected (6), TR $\beta$ -KO mice  
368 remained permanently narrow throughout the T3 treatment, suggesting that TR $\beta$  play an  
369 important role in adjusting heart rate stability in response to THs. This could be the result of  
370 developmental defects occurring in the central nervous system, as TR $\beta$ -KO mice show a ~40%  
371 reduction in the number of parvalbumin neurons in the anterior hypothalamic area, a pivotal  
372 brain area orchestrating autonomic, cardiovascular and stress response/functions (11, 47, 48).

373 Whether this altered heart rate stability of the TR $\beta$ -KO mice is also detectable in response to  
374 other stimuli other than THs (e.g. stress, drugs, etc.) remains to be elucidated.

375

### 376 **Conclusions**

377 Taken together, the present findings point towards a role of TR $\beta$  in regulating frequency  
378 distribution rather than average heart rate by a yet unknown mechanism possibly involving  
379 tissues other than the heart. More importantly, TR $\beta$  seems to be required for the full  
380 development of T3 induced tachycardia and hypertrophy; however, it remains unclear  
381 whether this is an acute effect or the consequence of the lack of TR $\beta$  actions during  
382 development.

383

384 **Acknowledgements**

385 We thank the Gemeinsame Tierhaltung Lübeck for animal caretaking.

386

387 **Funding**

388 We are grateful for funding from the German Research Council DFG in the framework of  
389 CRC/TR 296 “LOCOTACT” (funding ID 424957847), GRK1957 “Adipocyte Brain Crosstalk” and  
390 MI1242/3-2.

391

392 **Disclosures**

393 The authors have nothing to disclose.

394

395 **Authorship Contribution Statement**

396 Riccardo Dore, Sarah Christine Sentis and Jens Mittag conceptualized the study; Riccardo  
397 Dore, Sarah Christine Sentis, Kornelia Johann and Nuria Lopez-Alcantara performed the  
398 experiments; Julia Resch performed RT-qPCR; Riccardo Dore, Benedikt Obermayer, Robert  
399 Opitz and Jens Mittag analyzed data; Riccardo Dore, Lars Christian Moeller, Dagmar Führer,  
400 Benedikt Obermayer, Robert Opitz and Jens Mittag interpreted data; Riccardo Dore and Jens  
401 Mittag drafted the manuscript. All authors provided critical revision of the manuscript and  
402 approved its final version for publication.

403

404

405 **Figure Legends**

406 **Figure 1: The effect of housing temperature on heart rate and locomotor activity in TR $\beta$ -KO**  
407 **mice**

408 (A and B) Three-day radiotelemetry monitoring of heart rate frequency and (C and D)  
409 locomotor activity at 22°C and 30°C. (A and B) Average heart rate frequency and (C and D)  
410 locomotor activity during the dark active and light inactive phase at 22°C and 30°C. Black bars  
411 indicate dark active phases. Data represent mean  $\pm$  SEM for TR $\beta$ -KO (blue; n=5) and wildtype  
412 controls (black; n=5). \*\*P<0.01 (unpaired Students's *t* test).

413

414 **Figure 2: The effect of housing temperature on heart rate frequency distribution,**  
415 **pharmacological denervation and cardiac mRNA receptor levels in TR $\beta$ -KO mice**

416 (A) Heart rate frequency distribution of three consecutive days at 22°C and 30°C. (B)  
417 Contributions of the parasympathetic (PSNS) or sympathetic nervous system (SNS) as  
418 determined by change in heart rate frequency upon pharmacological receptors blockade with  
419 scopolamine methyl bromide or timolol maleate at 22°C and 30°C. (C) The effect of housing  
420 temperature on intrinsic heart rate after full pharmacological receptors blockade, and (D) on  
421 cardiac expression of the muscarinic cholinergic receptor 2 (*Chrm2*) and adrenoceptor beta 1  
422 (*Adrb1*). Data represent mean  $\pm$  SEM for TR $\beta$ -KO (blue; n=5-10/group) and wildtype controls  
423 (black; n=5-8/group). \*P<0.05, \*\*P<0.01, \*\*\*P<0.001 and \*\*\*\*P<0.0001 (Sidak's *post hoc* or  
424 unpaired Students's *t* test).

425

426 **Figure 3: The effect of T3 treatment on heart rate, heart rate frequency distribution and**  
427 **heart weight in TR $\beta$ -KO mice at 30°C**

428 (A) Radiotelemetry recordings of heart rate over 12 days of oral T3 treatment at 30°C. Black  
429 bars indicate dark active phases. (B) Average delta heart rate calculated as the difference  
430 between the maximum and minimum heart rate frequency recorded during dark and light  
431 phases, respectively. (C) Heart rate frequency distribution before and after T3 treatment at  
432 30°C. (D) The effect of T3 treatment at 30°C on heart weight normalized by body weight. Data  
433 represent mean  $\pm$  SEM for TR $\beta$ -KO (blue; n=3-5/group) and wildtype controls (black; n=3-  
434 7/group). #P<0.1, \*P<0.05, \*\*P<0.01 and \*\*\*\*P<0.0001 (Sidak's *post hoc* or unpaired  
435 Students's *t* test).



436

437 **Figure 4: Cardiac gene expression with and without T3 treatment in TR $\beta$ -KO mice at 30°C**

438 (A) Cardiac expression of genes involved in ‘pacemaker’ (*Hcn2* and *Hcn4*, mediating the  
439 ‘funny’ potassium current), repolarization (*Kcna7*, mediating ultra-rapid potassium current;  
440 *Kcnh2*, mediating potassium rapid current; *Kcnj3*, mediating potassium acetylcholine-  
441 mediated current; *Kcnq1*, mediating potassium slow current), contraction and calcium  
442 handling (*Myh6* and *Myh7*, myosin heavy chain with fast and slow ATPase activity,  
443 respectively; *Atp2a2* (*Serca2*) and *Pln*, mediating calcium uptake into the sarcoplasmic  
444 reticulum and the inhibition of SERCA2 activity, respectively, and *Ryr2*, mediating the calcium  
445 extrusion from the sarcoplasmic reticulum. (B) Cell type-specific expression of selected genes  
446 in adult mouse hearts. Dot plot was generated based on published single cell RNA-seq data of  
447 the Tabula muris senis project. Dot size represents percentage of cells expressing the gene of  
448 interest in a given cell type and color denotes mean expression levels. Data represent mean  $\pm$   
449 SEM for TR $\beta$ -KO (blue; n=4-5/group) and wildtype controls (black; n=4-7/group). \*P<0.05,  
450 \*\*P<0.01, \*\*\*P<0.001 and \*\*\*\*P<0.0001 (Sidak’s *post hoc* test).

451

452

453 **References**

- 454 **1.** Kahaly GJ, Dillmann WH 2005 Thyroid hormone action in the heart. *Endocr Rev*  
455 **26**:704-728.
- 456 **2.** Razvi S, Jabbar A, Pingitore A, Danzi S, Biondi B, Klein I, Peeters R, Zaman A, Iervasi G  
457 2018 Thyroid Hormones and Cardiovascular Function and Diseases. *J Am Coll Cardiol*  
458 **71**:1781-1796.
- 459 **3.** Falcone M, Miyamoto T, Fierro-Renoy F, Macchia E, DeGroot LJ 1992 Antipeptide  
460 polyclonal antibodies specifically recognize each human thyroid hormone receptor  
461 isoform. *Endocrinology* **131**:2419-2429.
- 462 **4.** Gloss B, Trost S, Bluhm W, Swanson E, Clark R, Winkfein R, Janzen K, Giles W,  
463 Chassande O, Samarut J, Dillmann W 2001 Cardiac ion channel expression and  
464 contractile function in mice with deletion of thyroid hormone receptor alpha or beta.  
465 *Endocrinology* **142**:544-550.
- 466 **5.** Swanson EA, Gloss B, Belke DD, Kaneshige M, Cheng SY, Dillmann WH 2003 Cardiac  
467 expression and function of thyroid hormone receptor beta and its PV mutant.  
468 *Endocrinology* **144**:4820-4825.
- 469 **6.** Dore R, Watson L, Hollidge S, Krause C, Sentis SC, Oelkrug R, Geissler C, Johann K,  
470 Pedaran M, Lyons G, Lopez-Alcantara N, Resch J, Sayk F, Iwen KA, Franke A, Boysen  
471 TJ, Dalley JW, Lorenz K, Moran C, Rennie KL, Arner A, Kirchner H, Chatterjee K, Mittag  
472 J 2023 Resistance to thyroid hormone induced tachycardia in RTHalpha syndrome. *Nat*  
473 *Commun* **14**:3312.
- 474 **7.** Johansson C, Gothe S, Forrest D, Vennstrom B, Thoren P 1999 Cardiovascular  
475 phenotype and temperature control in mice lacking thyroid hormone receptor-beta  
476 or both alpha1 and beta. *Am J Physiol* **276**:H2006-2012.

- 477 **8.** Johansson C, Vennstrom B, Thoren P 1998 Evidence that decreased heart rate in  
478 thyroid hormone receptor-alpha1-deficient mice is an intrinsic defect. *Am J Physiol*  
479 **275**:R640-646.
- 480 **9.** Macchia PE 2000 Increased sensitivity to thyroid hormone in mice with complete  
481 deficiency of thyroid hormone receptor alpha. *Proceedings of the National Academy*  
482 *of Sciences* **98**:349-354.
- 483 **10.** Mittag J, Davis B, Vujovic M, Arner A, Vennstrom B 2010 Adaptations of the  
484 autonomous nervous system controlling heart rate are impaired by a mutant thyroid  
485 hormone receptor-alpha1. *Endocrinology* **151**:2388-2395.
- 486 **11.** Mittag J, Lyons DJ, Sallstrom J, Vujovic M, Dudazy-Gralla S, Warner A, Wallis K,  
487 Alkemade A, Nordstrom K, Monyer H, Broberger C, Arner A, Vennstrom B 2013  
488 Thyroid hormone is required for hypothalamic neurons regulating cardiovascular  
489 functions. *J Clin Invest* **123**:509-516.
- 490 **12.** Sadow PM, Chassande O, Gauthier K, Samarut J, Xu J, O'Malley BW, Weiss RE 2003  
491 Specificity of thyroid hormone receptor subtype and steroid receptor coactivator-1  
492 on thyroid hormone action. *Am J Physiol Endocrinol Metab* **284**:E36-46.
- 493 **13.** Wikstrom L, Johansson C, Salto C, Barlow C, Campos Barros A, Baas F, Forrest D,  
494 Thoren P, Vennstrom B 1998 Abnormal heart rate and body temperature in mice  
495 lacking thyroid hormone receptor alpha 1. *EMBO J* **17**:455-461.
- 496 **14.** Weiss RE, Murata Y, Cua K, Hayashi Y, Seo H, Refetoff S 1998 Thyroid hormone action  
497 on liver, heart, and energy expenditure in thyroid hormone receptor beta-deficient  
498 mice. *Endocrinology* **139**:4945-4952.
- 499 **15.** Gordan R, Gwathmey JK, Xie LH 2015 Autonomic and endocrine control of  
500 cardiovascular function. *World J Cardiol* **7**:204-214.
- 501 **16.** Axsom JE, Nanavati AP, Rutishauser CA, Bonin JE, Moen JM, Lakatta EG 2020  
502 Acclimation to a thermoneutral environment abolishes age-associated alterations in

- 503 heart rate and heart rate variability in conscious, unrestrained mice. *Geroscience*  
504 **42**:217-232.
- 505 **17.** Morgan JL, Svenson KL, Lake JP, Zhang W, Stearns TM, Marion MA, Peters LL, Paigen  
506 B, Donahue LR 2014 Effects of housing density in five inbred strains of mice. *PLoS One*  
507 **9**:e90012.
- 508 **18.** Paigen B, Svenson KL, Von Smith R, Marion MA, Stearns T, Peters LL, Smith AL 2012  
509 Physiological effects of housing density on C57BL/6J mice over a 9-month period. *J*  
510 *Anim Sci* **90**:5182-5192.
- 511 **19.** Swoap SJ, Li C, Wess J, Parsons AD, Williams TD, Overton JM 2008 Vagal tone  
512 dominates autonomic control of mouse heart rate at thermoneutrality. *Am J Physiol*  
513 *Heart Circ Physiol* **294**:H1581-1588.
- 514 **20.** Billman GE 2011 Heart rate variability - a historical perspective. *Front Physiol* **2**:86.
- 515 **21.** Ganeshan K, Chawla A 2017 Warming the mouse to model human diseases. *Nat Rev*  
516 *Endocrinol* **13**:458-465.
- 517 **22.** Maloney SK, Fuller A, Mitchell D, Gordon C, Overton JM 2014 Translating animal  
518 model research: does it matter that our rodents are cold? *Physiology (Bethesda)*  
519 **29**:413-420.
- 520 **23.** Lopez-Alcantara N, Oelkrug R, Sentis SC, Kirchner H, Mittag J 2023 Lack of thyroid  
521 hormone receptor beta is not detrimental for non-alcoholic steatohepatitis  
522 progression. *iScience* **26**:108064.
- 523 **24.** Forrest D, Erway LC, Ng L, Altschuler R, Curran T 1996 Thyroid hormone receptor beta  
524 is essential for development of auditory function. *Nat Genet* **13**:354-357.
- 525 **25.** Forrest D, Hanebuth E, Smeyne RJ, Everds N, Stewart CL, Wehner JM, Curran T 1996  
526 Recessive resistance to thyroid hormone in mice lacking thyroid hormone receptor  
527 beta: evidence for tissue-specific modulation of receptor function. *The EMBO Journal*  
528 **15**:3006-3015.

- 529 **26.** Herrmann B, Harder L, Oelkrug R, Chen J, Gachkar S, Nock S, Resch J, Korkowski M,  
530 Heuer H, Mittag J 2020 Central Hypothyroidism Impairs Heart Rate Stability and  
531 Prevents Thyroid Hormone-Induced Cardiac Hypertrophy and Pyrexia. *Thyroid*  
532 **30**:1205-1216.
- 533 **27.** Hoefig CS, Harder L, Oelkrug R, Meusel M, Vennstrom B, Brabant G, Mittag J 2016  
534 Thermoregulatory and Cardiovascular Consequences of a Transient Thyrotoxicosis  
535 and Recovery in Male Mice. *Endocrinology* **157**:2957-2967.
- 536 **28.** Hoefig CS, Jacobi SF, Warner A, Harder L, Schanze N, Vennström B, Mittag J 2015 3-  
537 Iodothyroacetic acid lacks thermoregulatory and cardiovascular effects in vivo. *British*  
538 *Journal of Pharmacology* **172**:3426-3433.
- 539 **29.** Johann K, Cremer AL, Fischer AW, Heine M, Pensado ER, Resch J, Nock S, Virtue S,  
540 Harder L, Oelkrug R, Astiz M, Brabant G, Warner A, Vidal-Puig A, Oster H, Boelen A,  
541 Lopez M, Heeren J, Dalley JW, Backes H, Mittag J 2019 Thyroid-Hormone-Induced  
542 Browning of White Adipose Tissue Does Not Contribute to Thermogenesis and  
543 Glucose Consumption. *Cell Rep* **27**:3385-3400 e3383.
- 544 **30.** Pedaran M, Oelkrug R, Sun Q, Resch J, Schomburg L, Mittag J 2021 Maternal Thyroid  
545 Hormone Programs Cardiovascular Functions in the Offspring. *Thyroid* **31**:1424-1435.
- 546 **31.** Wolf FA, Angerer P, Theis FJ 2018 SCANPY: large-scale single-cell gene expression data  
547 analysis. *Genome Biol* **19**:15.
- 548 **32.** Hameed S, Patterson M, Dhillon WS, Rahman SA, Ma Y, Holton C, Gogakos A, Yeo GSH,  
549 Lam BYH, Poley-Wolf J, Fenske W, Bell J, Anastasovska J, Samarut J, Bloom SR, Bassett  
550 JHD, Williams GR, Gardiner JV 2017 Thyroid Hormone Receptor Beta in the  
551 Ventromedial Hypothalamus Is Essential for the Physiological Regulation of Food  
552 Intake and Body Weight. *Cell Rep* **19**:2202-2209.
- 553 **33.** Tabula Muris C 2020 A single-cell transcriptomic atlas characterizes ageing tissues in  
554 the mouse. *Nature* **583**:590-595.

- 555 **34.** Dillmann W 2010 Cardiac hypertrophy and thyroid hormone signaling. *Heart Fail Rev*  
556 **15**:125-132.
- 557 **35.** Barreto-Chaves ML, Senger N, Fevereiro M, Parletta AC, Takano A 2020 Impact of  
558 hyperthyroidism on cardiac hypertrophy. *Endocr Connect* **9**:R59-69.
- 559 **36.** Hoit BD, Khoury SF, Shao Y, Gabel M, Liggett SB, Walsh RA 1997 Effects of thyroid  
560 hormone on cardiac beta-adrenergic responsiveness in conscious baboons.  
561 *Circulation* **96**:592-598.
- 562 **37.** Stiles GL, Lefkowitz RJ 1981 Thyroid hormone modulation of agonist--beta-adrenergic  
563 receptor interactions in the rat heart. *Life Sci* **28**:2529-2536.
- 564 **38.** Williams LT, Lefkowitz RJ, Watanabe AM, Hathaway DR, Besch HR 1977 Thyroid  
565 hormone regulation of beta-adrenergic receptor number. *Journal of Biological*  
566 *Chemistry* **252**:2787-2789.
- 567 **39.** Leenen FH, Harmsen E 1991 Antihypertensive drugs and cardiac trophic mechanisms.  
568 *J Cardiovasc Pharmacol* **17 Suppl 2**:S50-57.
- 569 **40.** Zierhut W, Zimmer HG 1989 Significance of myocardial alpha- and beta-adrenoceptors  
570 in catecholamine-induced cardiac hypertrophy. *Circ Res* **65**:1417-1425.
- 571 **41.** Hu LW, Benvenuti LA, Liberti EA, Carneiro-Ramos MS, Barreto-Chaves ML 2003  
572 Thyroxine-induced cardiac hypertrophy: influence of adrenergic nervous system  
573 versus renin-angiotensin system on myocyte remodeling. *Am J Physiol Regul Integr*  
574 *Comp Physiol* **285**:R1473-1480.
- 575 **42.** Bachman ES, Hampton TG, Dhillon H, Amende I, Wang J, Morgan JP, Hollenberg AN  
576 2004 The metabolic and cardiovascular effects of hyperthyroidism are largely  
577 independent of beta-adrenergic stimulation. *Endocrinology* **145**:2767-2774.
- 578 **43.** Ortiga-Carvalho TM, Hashimoto K, Pazos-Moura CC, Geenen D, Cohen R, Lang RM,  
579 Wondisford FE 2004 Thyroid Hormone Resistance in the Heart: Role of the Thyroid  
580 Hormone Receptor  $\beta$  Isoform. *Endocrinology* **145**:1625-1633.

- 581 **44.** Império GEd, Ramos IP, Santiago LA, Pereira GF, dos Santos Almeida NA, Fuziwara CS,  
582 Pazos-Moura CC, Kimura ET, Olivares EL, Ortiga-Carvalho TM 2015 The Impact of a  
583 Non-Functional Thyroid Receptor Beta upon Triiodotironine-Induced Cardiac  
584 Hypertrophy in Mice. *Cellular Physiology and Biochemistry* **37**:477-490.
- 585 **45.** Weiss RE, Korcarz C, Chassande O, Cua K, Sadow PM, Koo E, Samarut J, Lang R 2002  
586 Thyroid hormone and cardiac function in mice deficient in thyroid hormone receptor-  
587 alpha or -beta: an echocardiograph study. *Am J Physiol Endocrinol Metab* **283**:E428-  
588 435.
- 589 **46.** Flamant F, Poguet AL, Plateroti M, Chassande O, Gauthier K, Streichenberger N,  
590 Mansouri A, Samarut J 2002 Congenital hypothyroid Pax8(-/-) mutant mice can be  
591 rescued by inactivating the TRalpha gene. *Mol Endocrinol* **16**:24-32.
- 592 **47.** Harder L, Dudazy-Gralla S, Muller-Fielitz H, Hjerling Leffler J, Vennstrom B, Heuer H,  
593 Mittag J 2018 Maternal thyroid hormone is required for parvalbumin neurone  
594 development in the anterior hypothalamic area. *J Neuroendocrinol* **30**:e12573.
- 595 **48.** Laing BT, Anderson MS, Bonaventura J, Jayan A, Sarsfield S, Gajendiran A, Michaelides  
596 M, Aponte Y 2023 Anterior hypothalamic parvalbumin neurons are glutamatergic and  
597 promote escape behavior. *Curr Biol* **33**:3215-3228 e3217.
- 598

**A****22°C**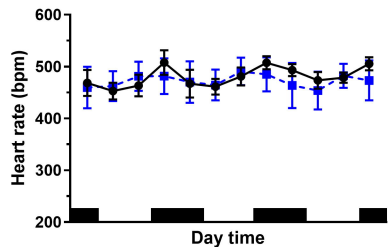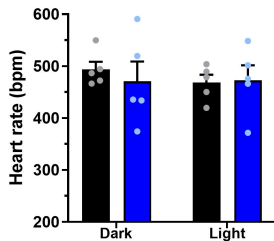**B****30°C**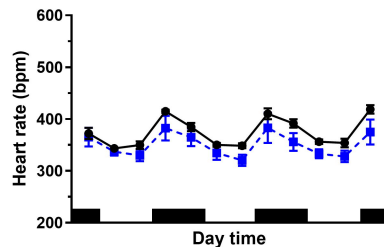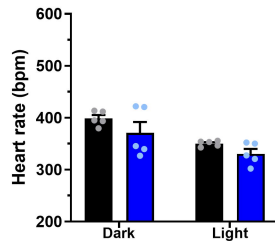**C****22°C**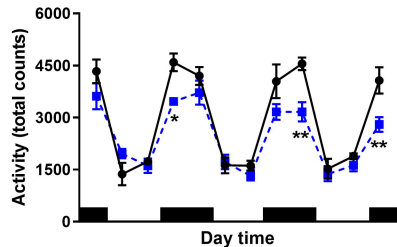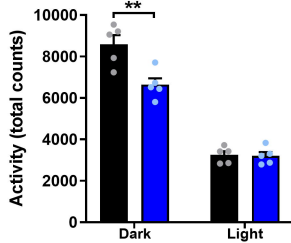**D****30°C**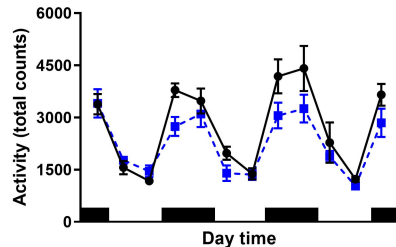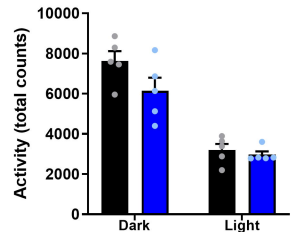

■ Wildtypes

■ TRβ-KO



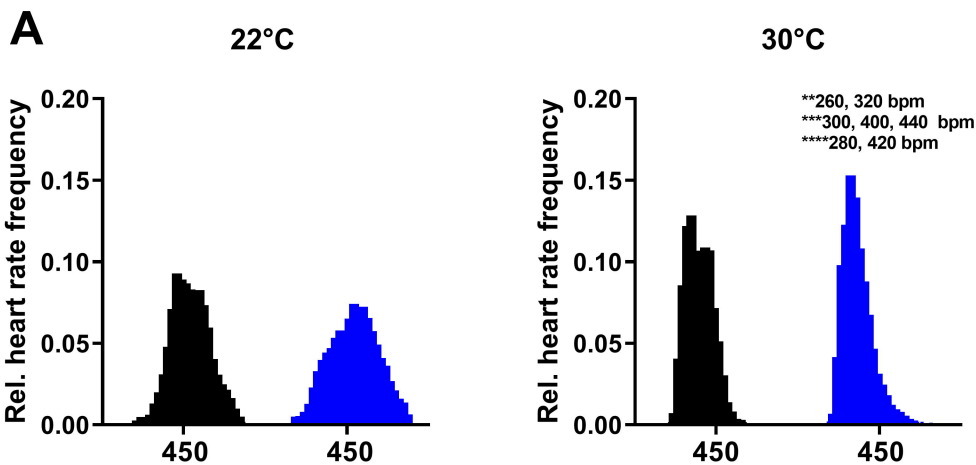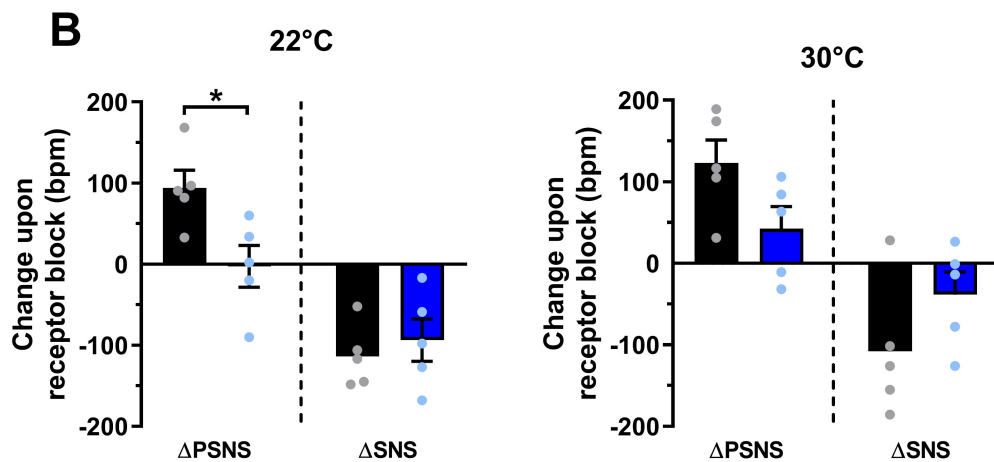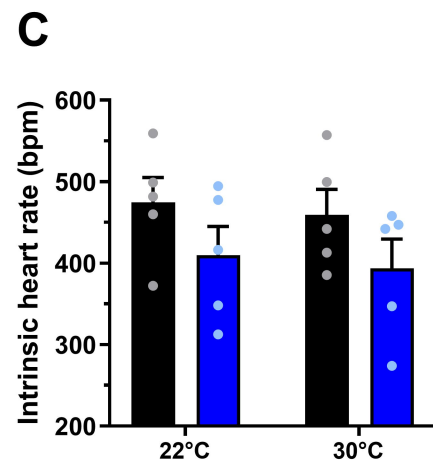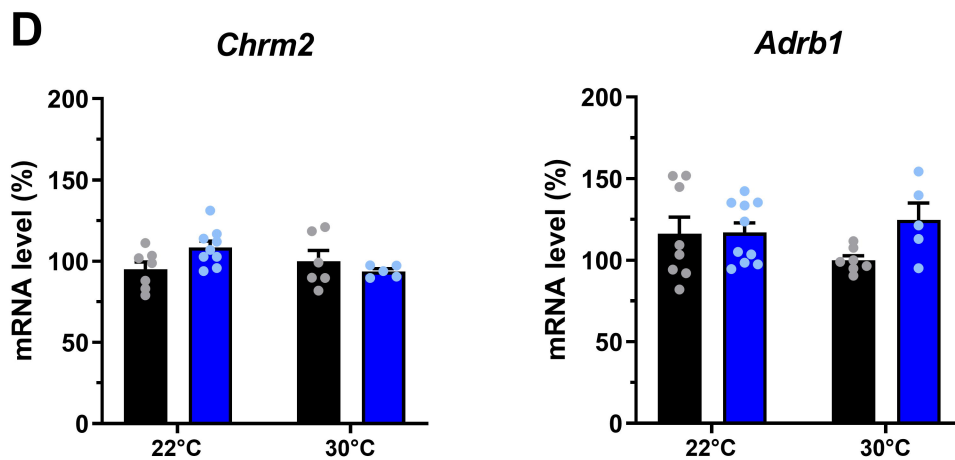

**A**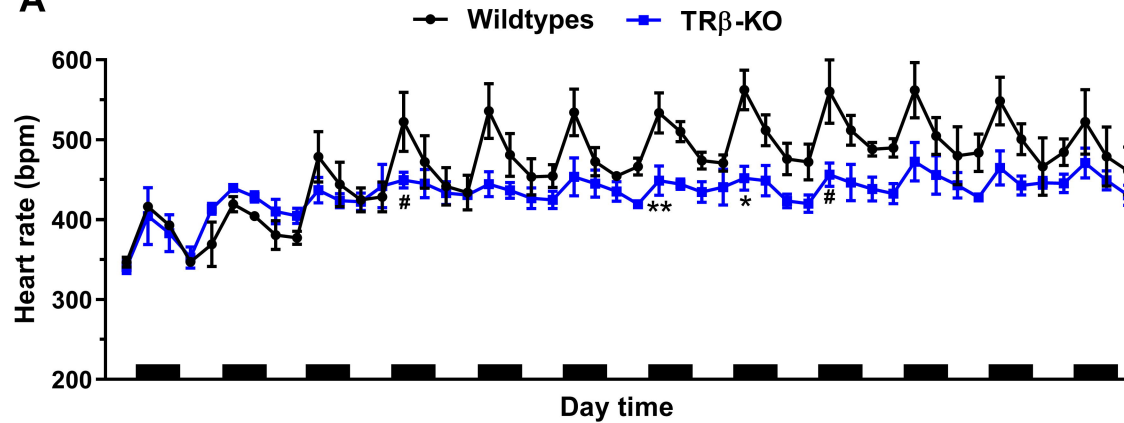**B**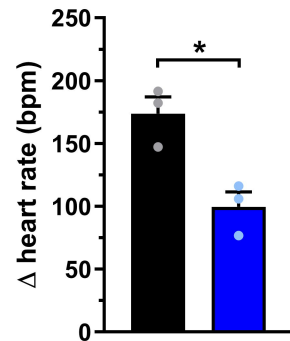**C**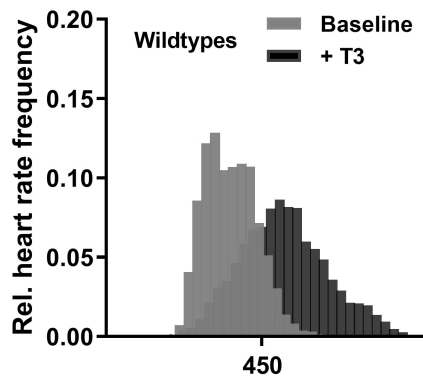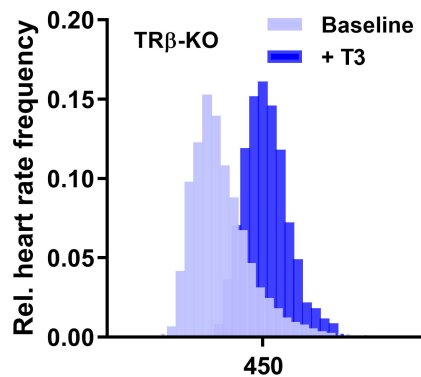**D**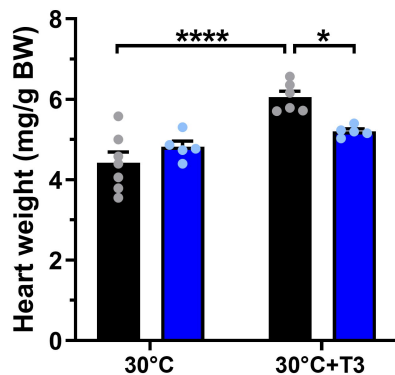

Source: https://www.biorxiv.org/content/10.1101/2023.11.21.567193.full.pdf
